# Supplementary material for: Siraitia grosvenorii Extract Protects Lipopolysaccharide-Induced Intestinal Inflammation in Mice via Promoting M2 Macrophage Polarization
Source: MDPI journal article supplement (doi:10.3390/ph17081023), 2024-08-04
Supplement: s1 [file s1]

| mode | chemical compound                                           | Molecular<br>formula | molecula<br>r weight | Retentio<br>n (min) | peak<br>area | peak area<br>percentage<br>% |
|------|-------------------------------------------------------------|----------------------|----------------------|---------------------|--------------|------------------------------|
| P    | Oleamide                                                    | C18H35NO             | 281.27138            | 16.168              | 4.90E+10     | 19.20                        |
| P    | Hexadecanamide                                              | C16H33NO             | 255.25575            | 16.002              | 2.11E+10     | 8.28                         |
| P    | Stearamide                                                  | C18H37NO             | 283.28706            | 17.444              | 1.69E+10     | 6.61                         |
| P    | N-Methylantranilic Acid                                     | C8H9NO2              | 151.06336            | 5.082               | 1.03E+10     | 4.05                         |
| P    | Erucamide                                                   | C22H43NO             | 337.33409            | 13.409              | 9.96E+09     | 3.90                         |
| P    | Palmitic Acid                                               | C16H32O2             | 273.26619            | 10.283              | 6.70E+09     | 2.62                         |
| P    | 3-Aminophenol                                               | C6H7NO               | 109.0528             | 1.149               | 4.36E+09     | 1.71                         |
| P    | Choline                                                     | C5H13NO              | 103.09977            | 0.99                | 4.02E+09     | 1.57                         |
| P    | Trigonelline HCl                                            | C7H7NO2              | 137.04791            | 1.033               | 3.63E+09     | 1.42                         |
| P    | 3-Hydroxy-2-methylpyridine                                  | C6H7NO               | 109.05282            | 4.957               | 2.97E+09     | 1.16                         |
| P    | Pyridoxal                                                   | C8H9NO3              | 167.05829            | 1.169               | 2.23E+09     | 0.87                         |
| P    | L-Pyroglutamic acid                                         | C5H7NO3              | 129.04268            | 1.255               | 2.04E+09     | 0.80                         |
| P    | 2,3,4,9-Tetrahydro-1H- $\beta$ -carboline-3-carboxylic acid | C12H12N2O2           | 216.08998            | 4.497               | 1.34E+09     | 0.52                         |
| P    | 6-Hydroxyindole                                             | C8H7NO               | 133.05276            | 5.018               | 1.33E+09     | 0.52                         |
| P    | Bis(4-ethylbenzylidene)sorbitol                             | C24H30O6             | 414.20359            | 11.258              | 1.30E+09     | 0.51                         |
| P    | cis,cis-Muconic acid                                        | C6H6O4               | 142.02677            | 2.374               | 1.13E+09     | 0.44                         |
| P    | Methylindole-3-acetate                                      | C11H11NO2            | 189.07892            | 5.367               | 9.75E+08     | 0.38                         |
| P    | Pipecolic acid                                              | C6H11NO2             | 112.05248            | 0.995               | 8.81E+08     | 0.34                         |
| P    | Chaulmoogric Acid                                           | C18H32O2             | 297.26645            | 13.79               | 8.14E+08     | 0.32                         |
| P    | Stachydrine                                                 | C7H13NO2             | 143.09473            | 1.138               | 7.30E+08     | 0.29                         |
| P    | Berberine                                                   | C20H17NO4            | 335.11531            | 7.505               | 6.78E+08     | 0.27                         |
| P    | 3-(2-Hydroxyethyl)indole                                    | C10H11NO             | 161.08399            | 7.21                | 4.66E+08     | 0.18                         |
| P    | 4-Methylumbelliferone                                       | C10H8O3              | 176.04738            | 7.707               | 3.11E+08     | 0.12                         |
| P    | 1-Linoleoylglycerol                                         | C21H38O4             | 336.26583            | 15.562              | 1.48E+08     | 0.06                         |
| P    | Oleanolic acid                                              | C30H48O3             | 438.34932            | 15.425              | 7.71E+07     | 0.03                         |
| P    | 3,5-di-tert-Butyl-4-hydroxybenzaldehyde                     | C15H22O2             | 234.16182            | 12.947              | 5.00E+07     | 0.02                         |
| P    | Lauro lactam                                                | C12H23NO             | 180.15124            | 16.816              | 3.79E+07     | 0.01                         |

|   |                                                |            |            |        |          |       |
|---|------------------------------------------------|------------|------------|--------|----------|-------|
| P | CitroflexA-4                                   | C20H34O8   | 402.22496  | 14.714 | 3.44E+07 | 0.01  |
| P | L-Valine                                       | C5H11NO2   | 117.07877  | 0.973  | 2.93E+07 | 0.01  |
| P | Palmitoylethanolamide                          | C18H37NO2  | 299.28191  | 15.165 | 1.77E+07 | 0.01  |
| P | Panthenol                                      | C9H19NO4   | 205.13118  | 18.324 | 1.73E+07 | 0.01  |
| P | Tridemorph                                     | C19H39NO   | 297.30275  | 16.978 | 1.72E+07 | 0.01  |
| P | $\alpha$ -Linolenic acid                       | C18H30O2   | 278.22426  | 12.734 | 1.55E+07 | 0.01  |
| P | Ursolic acid                                   | C30H48O3   | 456.35964  | 15.461 | 1.46E+07 | 0.01  |
| P | $\alpha$ -Boswellic acid                       | C30H48O3   | 456.35994  | 7.662  | 1.39E+07 | 0.01  |
| N | DL-Malic acid                                  | C4H6O5     | 134.02132  | 1.074  | 4.33E+10 | 16.93 |
| N | Citric acid                                    | C6H8O7     | 192.02679  | 1.166  | 1.46E+10 | 5.72  |
| N | (2R)-2,3-Dihydroxypropanoic acid               | C3H6O4     | 106.02638  | 1.007  | 1.05E+10 | 4.11  |
| N | D-(+)-Glucose                                  | C6H12O6    | 226.06866  | 1.245  | 9.63E+09 | 3.77  |
| N | Salsolinol                                     | C10H13NO2  | 179.09438  | 8.456  | 4.88E+09 | 1.91  |
| N | 3-Hydroxy-3-(methoxycarbonyl)pentanedioic acid | C7H10O7    | 206.04255  | 1.591  | 4.55E+09 | 1.78  |
| N | L-Threonic acid                                | C4H8O5     | 136.03703  | 0.888  | 4.34E+09 | 1.70  |
| N | Gluconic acid                                  | C6H12O7    | 196.05797  | 1.012  | 2.92E+09 | 1.14  |
| N | $\delta$ -Ribono-1,4-lactone                   | C5H8O5     | 148.03699  | 1.043  | 2.44E+09 | 0.96  |
| N | Mogroside V                                    | C60H102O29 | 1286.64704 | 6.424  | 1.99E+09 | 0.78  |
| N | $\delta$ -Gluconicacid $\delta$ -lactone       | C6H10O6    | 178.04753  | 1.114  | 1.97E+09 | 0.77  |
| N | Pyrogallol                                     | C6H6O3     | 126.03162  | 1.894  | 1.50E+09 | 0.59  |
| N | Sucrose                                        | C12H22O11  | 342.11597  | 0.861  | 1.38E+09 | 0.54  |
| N | Salicylamide                                   | C7H7NO2    | 137.04754  | 3.326  | 9.05E+08 | 0.35  |
| N | Ferulic acid                                   | C10H10O4   | 194.05777  | 5.92   | 7.21E+08 | 0.28  |
| N | Lactose                                        | C12H22O11  | 388.1215   | 1.622  | 6.61E+08 | 0.26  |
| N | Terephthalic acid                              | C8H6O4     | 166.02653  | 3.15   | 4.96E+08 | 0.19  |
| N | mogroside IV                                   | C54H92O24  | 1124.59623 | 6.808  | 4.18E+08 | 0.16  |
| N | Mogroside IIIe/III A1/ III/ III A2 or isomers  | C48H82O19  | 962.54341  | 7.617  | 4.06E+08 | 0.16  |
| N | Kojic Acid                                     | C6H6O4     | 142.02655  | 1.759  | 3.74E+08 | 0.15  |

|   |                                                                                                                                                  |           |            |        |          |      |
|---|--------------------------------------------------------------------------------------------------------------------------------------------------|-----------|------------|--------|----------|------|
| N | 6-Hydroxypicolinic acid                                                                                                                          | C6H5NO3   | 139.02662  | 1.236  | 3.59E+08 | 0.14 |
| N | Aconitic Acid                                                                                                                                    | C6H6O6    | 174.01617  | 1.274  | 3.58E+08 | 0.14 |
| N | 4-Pyridoxic acid                                                                                                                                 | C8H9NO4   | 183.05321  | 2.085  | 3.43E+08 | 0.13 |
| N | 6-Gingerol                                                                                                                                       | C17H26O4  | 294.18394  | 10.502 | 2.48E+08 | 0.10 |
| N | Leucine                                                                                                                                          | C6H13NO2  | 131.09453  | 4.233  | 2.19E+08 | 0.09 |
| N | Salicylic acid                                                                                                                                   | C7H6O3    | 138.03152  | 7.164  | 1.97E+08 | 0.08 |
| N | 11-Oxomogroside V                                                                                                                                | C60H100O2 | 1284.63165 | 6.266  | 1.83E+08 | 0.07 |
| N | L-Glutamic acid                                                                                                                                  | C5H9NO4   | 147.05307  | 1.042  | 1.57E+08 | 0.06 |
| N | Azelaic acid                                                                                                                                     | C9H16O4   | 188.10481  | 6.761  | 1.47E+08 | 0.06 |
| N | D-(+)-Mannose                                                                                                                                    | C6H12O6   | 180.0632   | 11.397 | 1.34E+08 | 0.05 |
| N | N-Acetylvaline                                                                                                                                   | C7H13NO3  | 159.08945  | 4.694  | 1.18E+08 | 0.05 |
| N | 16-Hydroxyhexadecanoic acid                                                                                                                      | C16H32O3  | 272.23512  | 15.436 | 1.08E+08 | 0.04 |
| N | N-Isovalerylglycine                                                                                                                              | C7H13NO3  | 159.08945  | 5.067  | 1.02E+08 | 0.04 |
| N | Mogroside IIIe/III A1/ III/ III A2 or isomers                                                                                                    | C48H82O19 | 962.54341  | 7.038  | 9.59E+07 | 0.04 |
| N | Shikimic acid                                                                                                                                    | C7H10O5   | 174.05252  | 1.676  | 9.40E+07 | 0.04 |
| N | Mogroside IIE/ II B/ IIA/ II A2 or isomers                                                                                                       | C42H72O14 | 799.4871   | 8.166  | 8.42E+07 | 0.03 |
| N | Mogroside IIE/ II B/ IIA/ II A2 or isomers                                                                                                       | C42H72O14 | 799.4871   | 7.89   | 8.42E+07 | 0.03 |
| N | Resorcinol                                                                                                                                       | C6H6O2    | 110.0367   | 3.852  | 7.26E+07 | 0.03 |
| N | Glucose1-phosphate                                                                                                                               | C6H13O9P  | 260.02986  | 0.832  | 6.68E+07 | 0.03 |
| N | 3-Aminosalicylic acid                                                                                                                            | C7H7NO3   | 153.04257  | 3.731  | 6.41E+07 | 0.03 |
| N | Benzyl6-O-beta-D-glucopyranosyl-beta-D-glucopyranoside                                                                                           | C19H28O11 | 478.16838  | 3.213  | 5.16E+07 | 0.02 |
| N | 4-Hydroxybenzaldehyde                                                                                                                            | C7H6O2    | 122.0367   | 4.984  | 5.03E+07 | 0.02 |
| N | mogroside VI                                                                                                                                     | C66H112O3 | 1448.70054 | 6.295  | 3.95E+07 | 0.02 |
| N | 9-hydroxy-10,12-octadecadienoic acid                                                                                                             | C18H32O3  | 296.23497  | 12.91  | 3.89E+07 | 0.02 |
| N | PYROCATECHUIC ACID                                                                                                                               | C7H6O4    | 154.02659  | 4.819  | 2.89E+07 | 0.01 |
| N | (3beta,9xi,12beta,17xi)-20-[[6-O-(beta-D-Glucopyranosyl)-beta-D-glucopyranosyl]oxy]-12-hydroxydammar-24-en-3-yl2-O-beta-D-glucopyranosyl-beta-D- | C54H92O23 | 1154.60628 | 7.439  | 2.34E+07 | 0.01 |

|   |                                   |           |            |        |          |      |
|---|-----------------------------------|-----------|------------|--------|----------|------|
|   | glucopyranoside                   |           |            |        |          |      |
| N | Suberic acid                      | C8H14O4   | 174.08897  | 5.746  | 2.23E+07 | 0.01 |
| N | Glycyrrhizic<br>Acid,AmmoniumSalt | C42H62O16 | 822.40278  | 9.029  | 1.59E+07 | 0.01 |
| N | 4-Hydroxybenzoic acid             | C7H6O3    | 138.03152  | 11.404 | 1.12E+07 | 0.00 |
| N | Hosenkoside A                     | C48H82O20 | 1024.54414 | 8.056  | 1.07E+07 | 0.00 |
| N | 4-hydroxyphenylacetic acid        | C8H8O3    | 152.04721  | 8.458  | 7.92E+06 | 0.00 |
| N | Genistein                         | C15H10O5  | 270.05266  | 11.633 | 7.22E+06 | 0.00 |
