# Supplementary material for: Siraitia grosvenorii Extract Protects Lipopolysaccharide-Induced Intestinal Inflammation in Mice via Promoting M2 Macrophage Polarization
Source: MDPI journal article supplement (doi:10.3390/ph17081023), 2024-08-04
Supplement: s1 [file s1]

|                      |        | 1     | 2     | 3     | 4     | 5     | 6     |
|----------------------|--------|-------|-------|-------|-------|-------|-------|
| <b>Control group</b> | Day 1  | 22.24 | 20.65 | 21.16 | 20.92 | 20.38 | 20.91 |
|                      | Day 2  | 22.14 | 20.10 | 20.48 | 20.70 | 21.67 | 21.37 |
|                      | Day 3  | 22.11 | 20.19 | 21.76 | 20.60 | 21.06 | 21.41 |
|                      | Day 4  | 22.54 | 20.54 | 21.58 | 21.06 | 22.26 | 21.95 |
|                      | Day 5  | 22.24 | 20.82 | 21.17 | 21.76 | 22.59 | 22.33 |
|                      | Day 6  | 22.20 | 21    | 21.33 | 21.49 | 22.23 | 21.85 |
|                      | Day 7  | 22.20 | 20.88 | 21.14 | 21.93 | 22.49 | 22.45 |
|                      | Day 8  | 22.06 | 20.89 | 22.05 | 21.67 | 22.64 | 22.1  |
|                      | Day 9  | 22.22 | 20.88 | 22.06 | 21.72 | 22.93 | 22.21 |
|                      | Day 10 | 22.14 | 20.73 | 21.63 | 22.02 | 23    | 22.08 |
|                      | Day 11 | 21.3  | 20.69 | 21.75 | 21.53 | 22.84 | 22.15 |
|                      | Day 12 | 22.14 | 21.1  | 22.14 | 22.09 | 22.49 | 22.62 |
|                      | Day 13 | 22.35 | 21.15 | 22.21 | 22.3  | 22.94 | 22.69 |
|                      | Day 14 | 22.85 | 21.19 | 22.3  | 22.25 | 23.22 | 23.11 |
|                      | Day 15 | 22.68 | 21.5  | 22.6  | 22.21 | 23.52 | 23.2  |
| <b>LPS group</b>     | Day 1  | 20.83 | 20.47 | 20.36 | 20.58 | 22.8  | 21.34 |
|                      | Day 2  | 21.09 | 21.22 | 20.39 | 22.63 | 20.52 | 21.27 |
|                      | Day 3  | 21.34 | 20.62 | 21.05 | 22.63 | 21.07 | 21.02 |
|                      | Day 4  | 21.62 | 21.03 | 21.34 | 20.84 | 22.52 | 21.30 |
|                      | Day 5  | 21.44 | 20.97 | 21.35 | 22.83 | 21.60 | 21.66 |
|                      | Day 6  | 21.43 | 21.40 | 21.26 | 23.08 | 21.87 | 22.16 |
|                      | Day 7  | 21.66 | 21.18 | 21.17 | 22.74 | 21.42 | 21.97 |
|                      | Day 8  | 21.85 | 21.04 | 20.99 | 23.01 | 21.42 | 22.8  |
|                      | Day 9  | 21.93 | 21.34 | 21.3  | 23.4  | 21.42 | 22.88 |
|                      | Day 10 | 21.92 | 21.28 | 21.51 | 22.78 | 21.36 | 22.16 |
|                      | Day 11 | 22.1  | 21.48 | 21.86 | 23.85 | 21.7  | 22.71 |
|                      | Day 12 | 22.21 | 21.51 | 21.27 | 23.31 | 22.12 | 22.81 |
|                      | Day 13 | 22.48 | 21.77 | 21.27 | 23.6  | 22.24 | 23    |
|                      | Day 14 | 22.68 | 21.79 | 21.61 | 23.38 | 22.17 | 23.07 |
|                      | Day 15 | 22.98 | 21.44 | 20.68 | 21.73 | 21.25 | 20.82 |
| <b>SGE 50mg/Kg</b>   | Day 1  | 19.60 | 22.4  | 21.71 | 23.49 | 21.22 | 20.62 |
|                      | Day 2  | 19.67 | 22.20 | 21.51 | 21.97 | 23.68 | 20.88 |
|                      | Day 3  | 20.70 | 22.40 | 22.17 | 22.32 | 24.20 | 20.95 |
|                      | Day 4  | 21.09 | 22.22 | 24.24 | 23.11 | 22.14 | 21.35 |
|                      | Day 5  | 21.10 | 22.24 | 23.25 | 23.99 | 21.85 | 21.61 |
|                      | Day 6  | 20.89 | 22.23 | 23.29 | 23.45 | 22.02 | 21.56 |
|                      | Day 7  | 21.41 | 22.55 | 23.41 | 24.20 | 21.84 | 21.83 |
|                      | Day 8  | 20.65 | 22.74 | 23.72 | 23.92 | 22.04 | 22.16 |
|                      | Day 9  | 21.22 | 21.93 | 24.24 | 23.16 | 22.13 | 21.87 |
|                      | Day 10 | 21.1  | 22.19 | 23.61 | 24.63 | 22.45 | 22.15 |
|                      | Day 11 | 21.32 | 22.46 | 23.55 | 24.64 | 22.25 | 22.59 |
|                      | Day 12 | 21.35 | 22.54 | 23.83 | 25    | 22.48 | 22.46 |

|                              |              |       |       |       |       |       |       |
|------------------------------|--------------|-------|-------|-------|-------|-------|-------|
|                              | Day 13       | 21.48 | 23    | 23.97 | 25.08 | 22.4  | 22.66 |
|                              | Day 14       | 22.2  | 22.73 | 24.04 | 24.87 | 22.42 | 22.7  |
|                              | Day 15       | 22.07 | 23.78 | 25.17 | 22.87 | 23.28 | 23.1  |
| <b>SGE<br/>100mg/Kg</b>      | <b>Day 1</b> | 20.61 | 21.99 | 21.07 | 21.09 | 21.40 | 21.28 |
|                              | Day 2        | 21.18 | 22.06 | 21.70 | 21.31 | 21.54 | 21.80 |
|                              | Day 3        | 21.55 | 22.30 | 21.90 | 21.70 | 21.60 | 21.50 |
|                              | Day 4        | 21.04 | 22.09 | 21.25 | 21.23 | 21.62 | 21.45 |
|                              | Day 5        | 21.36 | 22.34 | 21.25 | 21.72 | 21.65 | 21.91 |
|                              | Day 6        | 21.11 | 22.66 | 21.74 | 21.85 | 21.74 | 22    |
|                              | Day 7        | 21.17 | 22.93 | 22.22 | 21.86 | 22.85 | 22.08 |
|                              | Day 8        | 21.36 | 23.1  | 21.74 | 22.48 | 22.49 | 22.76 |
|                              | Day 9        | 21.71 | 22.89 | 22.07 | 22.82 | 22.45 | 22.62 |
|                              | Day 10       | 21.18 | 23.33 | 22.3  | 22.92 | 23.36 | 22.92 |
|                              | Day 11       | 21.47 | 23.07 | 22.37 | 23.42 | 22.62 | 22.93 |
|                              | Day 12       | 21.45 | 22.98 | 22.33 | 22.9  | 22.37 | 22.69 |
|                              | Day 13       | 21.55 | 23.17 | 22.64 | 23.51 | 23.13 | 22.87 |
|                              | Day 14       | 21.52 | 23.08 | 22.29 | 23.53 | 23.03 | 22.78 |
|                              | Day 15       | 21.85 | 23.5  | 23.8  | 22.48 | 23.09 | 23.37 |
| <b>SGE<br/>200<br/>mg/Kg</b> | Day 1        | 20.67 | 22.09 | 20.21 | 22.8  | 20.71 | 21.12 |
|                              | Day 2        | 20.59 | 22.71 | 23.13 | 21.31 | 20.82 | 21.95 |
|                              | Day 3        | 20.53 | 23.07 | 22.98 | 21.04 | 20.49 | 21.59 |
|                              | Day 4        | 20.30 | 22.95 | 20.77 | 22.68 | 20.57 | 21.82 |
|                              | Day 5        | 20.58 | 22.80 | 22.90 | 21.35 | 20.35 | 21.28 |
|                              | Day 6        | 20.35 | 22.69 | 22.99 | 21.68 | 20.51 | 21.63 |
|                              | Day 7        | 20.60 | 22.84 | 22.73 | 21.35 | 20.12 | 21.29 |
|                              | Day 8        | 20.85 | 23.81 | 23.31 | 21.93 | 20.99 | 21.56 |
|                              | Day 9        | 20.59 | 23.69 | 23.48 | 21.3  | 21.01 | 21.6  |
|                              | Day 10       | 20.4  | 23.59 | 23.2  | 21.6  | 20.74 | 21.55 |
|                              | Day 11       | 20.61 | 24.33 | 23.38 | 21.96 | 21.05 | 21.55 |
|                              | Day 12       | 20.77 | 24.24 | 24.23 | 22.42 | 21.19 | 21.76 |
|                              | Day 13       | 20.86 | 24.21 | 23.75 | 22.44 | 21.78 | 21.93 |
|                              | Day 14       | 20.98 | 24.6  | 24.72 | 22.33 | 21.56 | 22.07 |
|                              | Day 15       | 20.98 | 24.7  | 24.08 | 22.65 | 21.88 | 21.81 |
